# Supplementary material
Source: PubMed Central journal article supplement (PMC3946561)
Supplement: NIHMS547866-supplement-1.pdf [file NIHMS547866-supplement-1.pdf]

**Title: Adaptive prediction model in prospective molecular-signature-based clinical studies**

**Authors:** Guanghua Xiao<sup>1</sup>, Shuangge Ma<sup>2</sup>, John Minna<sup>4,5,6</sup>, Yang Xie<sup>1,3</sup>

**Supplementary Table 1.**

|              | X <sub>1</sub> , ..., X <sub>10</sub> | X <sub>11</sub> , ..., X <sub>20</sub> | X <sub>21</sub> , ..., X <sub>30</sub> | X <sub>31</sub> , ..., X <sub>50</sub> |
|--------------|---------------------------------------|----------------------------------------|----------------------------------------|----------------------------------------|
| Training set | √                                     | √                                      | -                                      | -                                      |
| Testing set  | √                                     | -                                      | √                                      | -                                      |

**Table S1. Simulation settings.** The variable with a check mark is a predictor, otherwise is not. It indicates the X<sub>1</sub>,...,X<sub>10</sub> are good predictors and X<sub>11</sub>,...,X<sub>20</sub> are unstable predictors.

**Supplementary Table 2.**

| AffyID      | Accession | Symbol             | Cancer                                                                                  |
|-------------|-----------|--------------------|-----------------------------------------------------------------------------------------|
| 219049_at   | NM_018371 | ChGn               | Prostate cancer                                                                         |
| 204995_at   | NM_003885 | CDK5R1             | Gangliogliomas, Prostate cancer                                                         |
| 205668_at   | NM_002349 | LY75(CD205)        | Lymphoma, thymoma                                                                       |
| 201109_s_at | NM_003246 | THBS1              | non-small cell lung cancer, carcinoma, neuron blastoma, colorectal cancer, melanoma     |
| 213156_at   | BC035518  |                    |                                                                                         |
| 227345_at   | NM_003840 | TNFRSF10D          | Breast cancer, Acutemyeloid leukemia, Neuro blastoma, Prostate cancer                   |
| 205808_at   | NM_004318 | ASPH               | Hepatocellular carcinoma, Bileduct cancer                                               |
| 216379_x_at | NM_013230 | CD24               | Non-small cell lung cancer, Ovarian cancer, Colorectal cancer, Carcinoma, Breast cancer |
| 203603_s_at | NM_014795 | ZFHX1B (SIP1,ZEB2) | Breast cancer                                                                           |
| 226142_at   | AC022507  |                    |                                                                                         |
| 209309_at   | NM_001185 | AZGP1              | Prostate cancer                                                                         |
| 221911_at   | NM_004956 | ETV1               | Prostate cancer                                                                         |
| 224973_at   | AF350451  | FAM46A             | Colorectal cancer                                                                       |

**Table S2. Biological verification of genes with high adaptive scores.** Among the top 13 genes with adaptive scores higher than 30, eleven of them have been shown to be important cancer related genes in other studies.

Supplementary Figure 1.

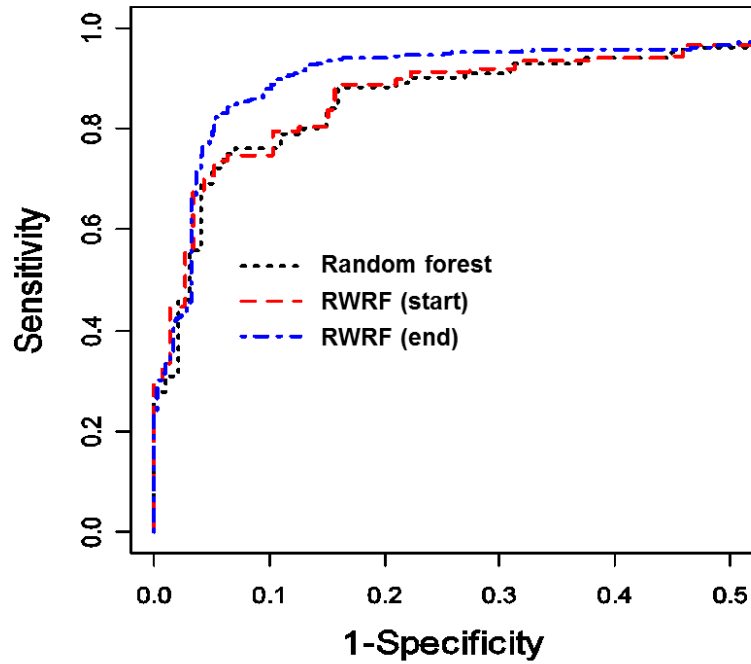

**Figure S1. ROC curves in the simulation study.** The black, red and blue lines represent the standard RF, the starting performance of re-weighted RF and ending performance of re-weighted RF. As expected, the starting performance of re-weighted RF is similar as the standard RF and prediction performance has improved significantly at the end of the study.
